# Supplementary material for: Admixture Mapping in Lupus Identifies Multiple Functional Variants within IFIH1 Associated with Apoptosis, Inflammation, and Autoantibody Production
Source: PubMed Central journal article supplement (PMC3575474; doi:10.1371/journal.pgen.1003222), 2013-02-18
Supplement: pgen.1003222.s003.pdf [file pgen.1003222.s003.pdf]

Figure S3

Pathway Commons

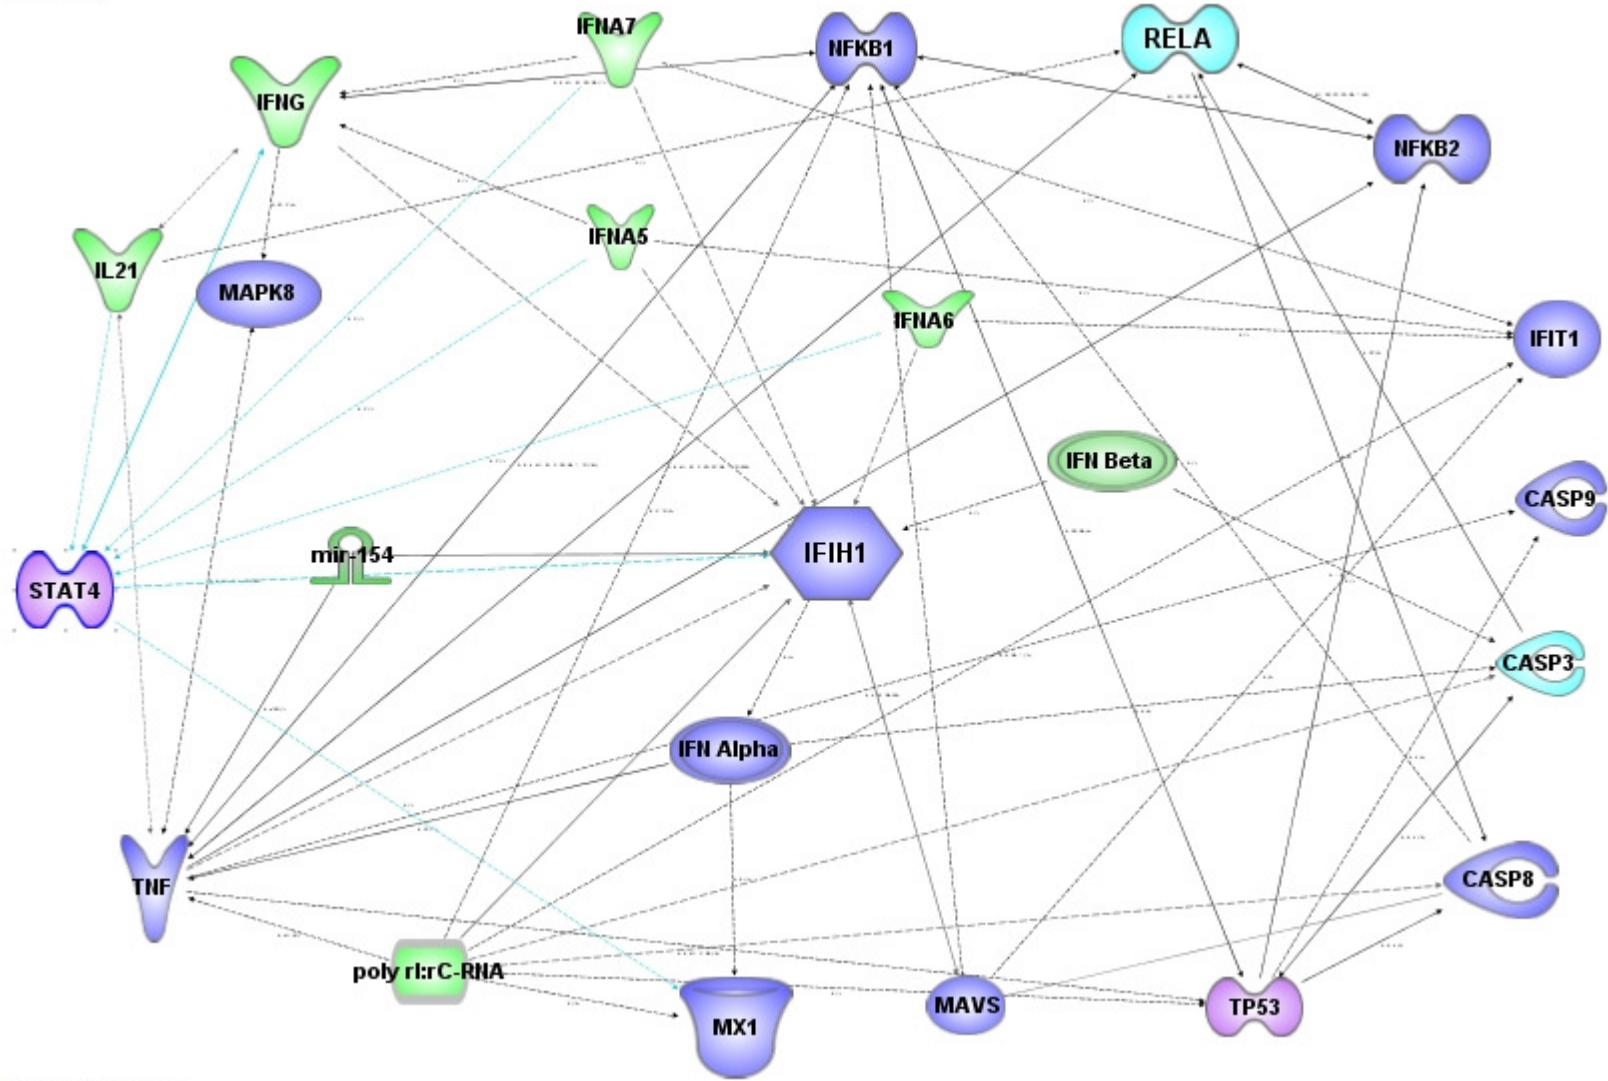

Pathway Commons
