# Supplementary material for: Admixture Mapping in Lupus Identifies Multiple Functional Variants within IFIH1 Associated with Apoptosis, Inflammation, and Autoantibody Production
Source: PubMed Central journal article supplement (PMC3575474; doi:10.1371/journal.pgen.1003222), 2013-02-18

Figure S6

A

Baboon

CCATGGCTTTTGGGCTGGTCTTAGGCACTTTCTGTCATTGTAGGCAAAGCTGTTCTTCTTTGTGTTGTTTACAAAA

Rhesus

CCATGGCTTTTGGGCTGGTCTTAGGCACTTTCTGTCATTGTAGGCAAAGCTGTTCTTCTTTGTGTTGTTTACAAAA

Human

CCATGGCTTTTGGGCTGGTCTTAGGCACTTGCTGTCATTGTAGGCAAAGGCTGTTCTTTTTTGTGTTGTTTACAAAA

Chimp

CCATGGCTTTTGGGCTGGTCTTAGGCACTTGCTGTCATTGTAGGCAAAGGCTGTTCTTTTTTGTGTTGTTTACAAAA

Gorilla

CCATGGCTTTTGGGCTGGTCTTAGGCACTTGCTGTCATTGTAGGCAAAGGCTGTTCTTTTTTGTGTTGTTTACAAAA

Orangutan

CCATGGCTTTTGGGCTGGTCTTAGGCACTTGCTGTCATTGTAGGCAAAGGCTGTTCTTTTTTGTGTTGTTTACAAAA

Gibbon

CCATGGCTTTTGGGCTGGTCTTAGGCACTTTCTGTCATTGTAGGCAAAGACTGTTCTTTTTTGTGTTGTTTACAAAA

Marmoset CCATGGCTTTTGGACTGGTCTTAGACACTTTCT----TTGTAGGCAAAGCTGTTCTTTTTTCTGTTGTTTACAAAA

Consensus

CCAUGGCUUUUGGGCUGGUCUUAGGCACUUKCU<sub>guca</sub>UUGUAGGCAARGCUGUUCUUYUUUGUGUUGUUUACAAAA

B

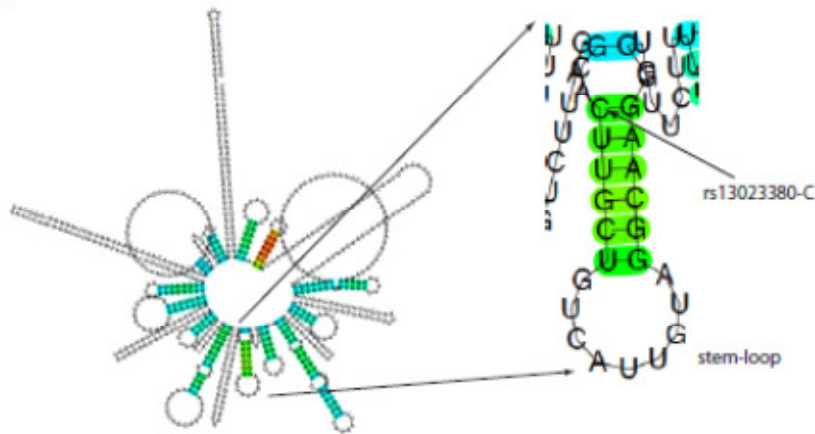

c

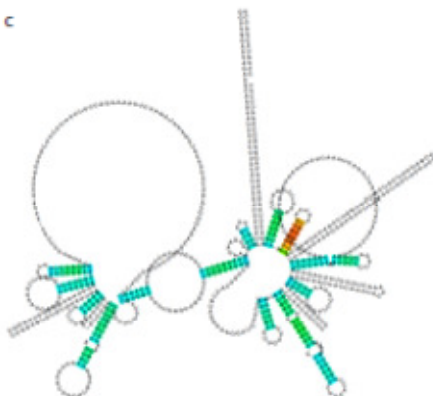

d

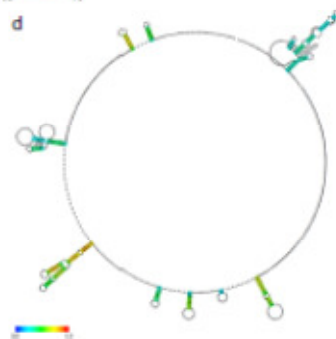

Supplement: pgen.1003222.s006.pdf [file pgen.1003222.s006.pdf]
